# Splicing-dependent NMD requires Prp17 in *Saccharomyces cerevisiae*

Jikai Wen<sup>1,2,3</sup>, Laetitia Marzi<sup>1</sup>, Jianming Wang<sup>1</sup>, Jinxin Ye<sup>2</sup>, and Saverio Brogna<sup>1</sup>

1. School of Biosciences, University of Birmingham, Edgbaston, Birmingham, UK. B15 2TT
2. Guangdong Provincial Key Laboratory of Protein Function and Regulation in Agricultural Organisms, College of Life Sciences, South China Agricultural University, Tianhe District, Guangzhou, Guangdong 510642, P.R. China.
3. Key Laboratory of Zoonosis of Ministry of Agriculture, South China Agricultural University, Tianhe District, Guangzhou, Guangdong 510642, P.R. China

## Abstract

Nonsense mediated mRNA decay (NMD) denotes that nonsense mutations, or errors in gene expression which introduce a premature translation termination codon (PTC), can lead to a reduction of mRNA level in any organism. Remarkably, whether a PTC will lead to NMD often depends on the presence of a downstream intron, splicing of which marks a spliced mRNA by deposition of the exon junction complex (EJC) in mammalian cells so as to affect its translation and degradation in the cytoplasm. *Saccharomyces cerevisiae*, which has introns only in 5% of its genes and lacks proteins essential for the EJC assembly, was not expected to undergo splicing-dependent NMD. Conversely, here we report that the presence of an intron can also enhance NMD in this organism. Following screening for genes that might be specifically involved in splicing-dependent NMD, we identified splicing factor Prp17 and surprisingly found that a portion of it co-sediments with ribosomal fractions. Together, our results indicate that whilst splicing-dependent NMD is a universal feature of eukaryotes this appears to be distinct from cytoplasmic NMD and depends on interactions between the spliceosome and ribosome that are unconnected to an EJC-like marking mechanism.

**Topic:** Prp17, splicing, EJC, NMD, translation, *S. cerevisiae*, yeast, RNA

## Introduction

Interrupting translation can greatly reduce mRNA levels in cells. The most apparent demonstration of this effect is the process of nonsense mediated mRNA decay (NMD). NMD occurs when nonsense or frameshift mutations or errors in transcription or pre-mRNA processing produce abnormal mRNAs encoding either a premature translation termination codon (PTC) or introduce other changes that place the normal stop codon in an atypical sequence context (1-5). NMD affects a large portion of a cell transcriptome and it is understood that, by destroying transcripts that could produce wasteful or toxic peptides, it might serve as a mechanism for increasing fidelity and efficiency of gene expression, and hence organism viability and development (6,7). The consensus view is that NMD represents the functional output of an mRNA surveillance process that requires the concerted function of a core of evolutionary conserved proteins, including UPF1, UPF2 and UPF3, to discriminate and destroy mRNAs with a PTC or a PTC-like feature (3,8); yet the molecular mechanism that would discriminate PTCs from normal stop codons remains unsatisfactorily understood in any organism (9). It is in fact debatable whether cells have such a specialized mRNA decay pathway at all; NMD could in part be a passive consequence of ribosomes detaching prematurely, leaving the transcript unprotected by scanning ribosomes (9).

Particularly, current models cannot fully explain the link between pre-mRNA splicing and NMD that has been observed in different organisms. Initial studies in human cells have concluded that a PTC induces strong NMD primarily when located upstream of an intron (10-13). Although some later studies have downplayed this early view that NMD is strictly linked to splicing in mammalian cells (14-17), the presence of downstream introns remains a strong genome-wide predictor of whether a PTC will lead to NMD in mammalian cells (18-20). Splice junctions are marked by the exon junction complex (EJC) - a multiprotein complex that binds mRNAs at splice junctions in the nucleus and remains associated with the mRNP until it is removed by the translating ribosome in the cytoplasm (21-23). Therefore, current models predict that the presence of one or more downstream EJCs is what distinguishes PTCs from normal stop codons which, since they are typically located in the last exon, have no downstream EJCs (24,25).

One study has reported that the EJC deposition might also enhance NMD in the evolutionarily distant organism *Neurospora crassa* (26). There are, however, examples of splicing-dependent NMD that the EJC model cannot explain (17,27-29). Specifically, we have previously reported that splicing can enhance NMD in *Schizosaccharomyces pombe*, regardless of whether a PTC is located downstream or upstream of an exon-exon junction, and also in mutant strains lacking core EJC proteins (30). These observations raise the possibility that there is a mechanism other than the EJC deposition that links splicing to NMD in *S. pombe*, and possibly other organisms.

*S. cerevisiae* is the first eukaryote in which NMD has been described (31); and extensively studied thereafter. Characteristically, only nonsense mutations that are close to the start of the coding region lead to obvious NMD in this organism (8,31-33). Current models predict that PTCs further downstream do not induce NMD because they are sufficiently close to the normal 3'UTR to allow an interaction of poly(A) binding protein (PABPC) with the prematurely terminating ribosome which inhibits NMD (34). However, the alternative possibility that PTCs at these positions do not cause NMD because there are no introns nearby has not been tested. Only a minority of protein coding genes contain introns in budding yeast - 285 out of 5749 based on a recent survey (35); yet, these include ribosomal proteins and other highly expressed genes, hence pre-mRNA splicing is very efficient in this organism with more than 24% of the cellular mRNA estimated to be spliced (35-38). Although *S. cerevisiae* genome does not encode Y14 and MAGO, proteins essential for the EJC assembly in mammalian cells (23), in view that splicing-dependent NMD does not require the EJC in *S. pombe*, we set to investigate whether splicing can also enhance NMD in this model organism in which there is extensive information on splicing and the factors involved (39). Various gene-constructs were examined with an intron either upstream or downstream of a PTC and at different distances, and found that at either position it can enhance NMD. Furthermore, following a screen for genes that might be specifically involved in splicing-dependent NMD, we identified splicing factor Prp17 and discovered that a substantial proportion of it co-sediments with monosomal mRNA. The observations indicate that splicing-dependent NMD might be mechanistically distinct from cytoplasmic NMD and predict that Prp17 couples splicing with translation by a mechanism other than deposition of an EJC-like entity in yeast.

## Materials and Methods

### Plasmids and strains

GFP-based NMD reporters were generated by cloning the coding sequence of the S65T GFP variant (accession number BD062761) into the BamHI sites of either pRS416 or pRS304 vector, flanked by TDH3 promoter and terminator sequences (40). Mutations were introduced by overlapping PCR and verified by sequencing. The intron of the pGFP-ivs construct derives from *ACT1*, *CYH2* or *UBC4* gene, which were all amplified from *S. cerevisiae* genomic DNA and cloned into the PmlI site at position 328 in the coding region (codon 110, out of frame) by blunt-end ligation. The pGFP-Aivs-147 and pGFP-Aivs-291 constructs were generated by inserting either a 147 or 291 bp DNA fragment in the AvrII site by overlapping PCR; AvrII site is 34 bp downstream of the *ACT1* intron. The fragments correspond to overlapping regions of the firefly luciferase gene (see primer sequences in Supplementary). The *RpL11B* and the *CYH2* genes were amplified from yeast genomic DNA or cDNA while the nonsense mutations were introduced by overlapping PCR and then cloned into pRS304-*DmADH* (see primer sequences). Unless otherwise indicated, the strains were isolated from the available Yeast MATalpha Collection (YSC1054). The strains are listed in Supplementary Table 1 and primers in Supplementary Table 2.

### Yeast transformation

Transformations were performed using the lithium acetate method as previously described (41), with minor modifications. In brief, 100  $\mu$ L of yeast cell pellet (about  $10^8$  cells per transformation) was resuspended and vigorously vortexed in 360  $\mu$ L of freshly prepared transformation mix (33% PEG 3350, 100  $\mu$ g ssDNA, 500 ng plasmid DNA in 0.1 M LiAc), incubated at 30°C for 20 minutes, and then heat shocked at 42°C in a water bath for 45 minutes. After heat shock, the yeast cells were pelleted by centrifugation, at 5000 rpm for 1 min, washed once with 1 mL of sterile water, resuspended in 1 mL of the same and 1/10 to 1/5 of it was spread on the selective Synthetic Drop-out Media plate (Formedium, UK). The plates were typically incubated at 30°C for 2 days until transformants colonies reached up to 0.5 mm in diameter.

## Northern blot assay

Total RNA was typically extracted from 10 mL cell cultures grown to 1-2 OD<sub>600</sub>, using hot acid phenol method as described (42). RNA was separated on 1.2% agarose gels in the presence of formaldehyde. RNA was blotted overnight by capillary transfer onto a nylon membrane (Hybond-N, GE Healthcare) and hybridized with <sup>32</sup>P random primed labelled probes as described (43). Probes were PCR amplified from plasmid clones (*GFP* and *DmADH*) or from genomic DNA (*rpL32*). Radioactive membranes were imaged using a phosphorimager (Molecular Image<sup>TM</sup>-FX, Bio-Rad), and the intensity of bands calculated using the Quantity One software (Bio-Rad).

## Luciferase assay

Yeast culture densities were adjusted to 1 OD<sub>600</sub>. Then, 10 µL of each culture was mixed with 15 µL of sterile purified water and loaded onto a 96-well microtiter plate which contained 25 µL of Steady-Glo luciferase substrate solution (Promega) in each well. Chemiluminescence was measured in triplicates of each culture using a microplate reader (Tecan). Relative GFP mRNA levels were quantified by real-time qRT-PCR with primers spanning the exons junction specific for the spliced transcript (GFP.Qs.rev and GFP.Q.fow, Supplementary Table 2), from equal amounts of total-RNA.

## Polyribosome profile

100 mL of yeast cell cultures were grown to 0.8 OD<sub>600</sub> and pretreated (15 min) with 100 µg/mL cycloheximide, pelleted by centrifugation at 4°C and then washed once in wash buffer (20 mM HEPES pH 7.4, 2 mM magnesium acetate, 2 mM MgCl<sub>2</sub>, 100 mM potassium acetate, 1 mM dithiothreitol (DTT)). Yeast cells were pelleted again, and resuspended in 300 µL lysis buffer - 20 mM HEPES pH 7.4, 2 mM magnesium acetate, 2 mM MgCl<sub>2</sub>, 100 mM potassium acetate, 1 mM DTT, 250 µg/mL heparin, 20 units/mL of RiboLock RNase inhibitor (Fermentas), 0.6% Triton X-100, 100 µg/mL cycloheximide, EDTA free Complete Protease Inhibitor Cocktail (Roche), and 1mM phenylmethanesulfonyl fluoride (PMSF). The cells were lysed by shaking using 500 mg of glass beads (0.5 mm, Sigma) in a Precellys 24 homogenizer (Bertin Corp.). Cell lysates were cleared of nuclei, mitochondria and insoluble cell debris by centrifugation at maximum speed for 20 min in a microcentrifuge at 4°C. Typically 40 OD<sub>260</sub>

units of extracts blanked with lysis buffer were loaded on 11 mL of a linear 10%–50% sucrose gradient (prepared in 20 mM HEPES pH 7.4, 2 mM magnesium acetate, 2 mM MgCl<sub>2</sub>, 100 mM potassium acetate) and centrifuged at 38,000 rpm for 2 h and 40 min in a SW40Ti rotor (Beckman). After centrifugation, fractions (typically 0.9 mL) were recovered from the bottom of the tube using a capillary cannula attached to a peristaltic pump and absorbance was monitored during fractionation using a UV monitor with flow-cell equipped with a 254-nm filter (UA-6, Teledyne ISCO). Fractions were precipitated by adding 1/10 volume of 100% trichloroacetic acid (TCA), vortexing, over-night incubation at 4°C which was followed by centrifugation at maximum speed for 30 min in a microfuge. The supernatant was then carefully removed and the precipitate was washed twice in ice-cold acetone and centrifuged for 2 min at 4°C; the pellet was analyzed by standard SDS-PAGE and Western blotting using anti-GFP polyclonal antibody (AbD Serotec).

## Results

### Splicing enhances NMD in *S. cerevisiae*

Initially, we assessed whether splicing affects NMD in *S. cerevisiae* by examining the expression of GFP NMD reporters with or without an intron (Fig 1A and Material and Methods). A PTC was introduced at codon positions 6 (PTC6) or 140 (PTC140); PTC6 being early in the coding region was expected to induce strong NMD based on previous observations, while PTC140, being in the second half of the ORF, should be much less effective in the absence of an intron (30,40). Three introns, derived from the *ACT1*, *CYH2* and *UBC4* genes, were examined; all are efficiently spliced both *in vitro* and *in vivo* (44-46). The intron-containing reporters, in which the intron was inserted at codon position 110 (Fig 1A), are designated here by the suffixes A-*ivs*, C-*ivs* and U-*ivs*, carrying the *ACT1*, *CYH2* and *UBC4* introns respectively. All of the PTC-less reporters produced intense GFP fluorescence (Fig 1B), indicating that all introns are efficiently and correctly spliced. As expected, no fluorescence was detected in any of the strains transformed with the PTC-containing (PTC+) reporters. Bands of the size expected for spliced mRNAs were detected by Northern blotting (Fig 1C-1N). The pre-mRNA band is also visible in the A-*ivs* reporter, and C-*ivs* in particular, however, its intensity is weak relative to the spliced band. It is possible the introns are not spliced as efficiently in this sequence context as in the gene of origin. Both introns are close to the 5' end in the endogenous pre-mRNAs, and it has been reported that splicing becomes inefficient when introns are placed further downstream from the 5' end (47). In contrast, splicing of U-*ivs*, which is also close to the 5' end in the endogenous pre-mRNA, appears to be very efficient at this position, as we detected no pre-mRNA accumulation, consistent with the U-*ivs* intron being one of the most efficiently spliced introns *in vitro* (44). U-*ivs* is 95 nt long (vs. A-*ivs* and C-*ivs* which are 309 nt and 501 nt, respectively); while such a slightly longer pre-mRNA band might be difficult to detect on the Northern blot, only the fragment corresponding to spliced transcript could be detected by RT-PCR. With respect to NMD, PTC6, as predicted, caused a strong mRNA reduction regardless of the presence of an intron (Fig 1C); in contrast, PTC140 induced strong NMD only in the reporters carrying either the A-*ivs* or C-*ivs* (Fig 1D and E). The shorter and apparently more efficiently spliced U-*ivs* intron lead to a moderate NMD enhancement as the PTC140 mRNA level is reduced only to ~ 60% of that of the PTC-less control (Fig 1F vs. 1C). As expected, the relative levels of the PTC+

mRNAs are similar to those of the PTC-less controls in NMD mutant strains, *UPF2Δ* (Fig 1G-1J) and *UPF1Δ* strains (Fig 1K-1N). However, in some instances the levels of PTC+ mRNAs were increased above those of the PTC-less controls in the NMD mutants. This baffling effect has been reported previously in different organisms, and might result from nonspecific mRNA stabilization in NMD mutants (9). We also examined several constructs in which the introns were inserted either in the 3'UTR of the GFP reporter or in the previously described PGK1-based intronless reporters (32), nearby positions at which PTCs do not lead to NMD; however, at these locations all the introns tested are inactive or very inefficiently spliced, hence we could not reliably assess their effect on NMD (unpublished observations),

To examine the effect of splicing on NMD further, we generated additional reporters derived from two endogenous intron-containing genes, *CYH2* and *RPL11B* (Fig 2). In these, a PTC was introduced either downstream (*CYH2*) or upstream of the intron (*RPL11B*), and corresponding intron-less constructs were generated via cDNA cloning (Fig 2A). To allow detection of the transcripts by Northern blotting and to inhibit splicing-independent NMD at these otherwise early PTCs, a fragment of the *Drosophila melanogaster Adh* gene was inserted in frame at the start of the coding region of each gene. The presence of the PTC induced apparent NMD in both genes. The level of PTC+ mRNA was reduced down to ~29% (*CYH2*) and ~26% (*RPL11B*) relative to the corresponding PTC-less controls (Fig 2B, lanes 1-2 and 5-6). Instead, no evidence of NMD could be detected in the cDNA reporters lacking the intron (constructs labeled with the  $\Delta$ ivs suffix, Fig 2B, lanes 3-4 and 7-8). Therefore, it appears that splicing can enhance NMD in these two genes as well and, as reported above for the GFP reporter, regardless of whether the PTC is located upstream (as in *RPL11B*) or downstream of the intron (as in *CYH2*). The levels of the PTC+ mRNAs are increased and comparable to that of the PTC-less controls in *UPF2Δ* (Fig 2C, lanes 1-2 and 5-6).

Next, we assessed whether the effect on NMD depends on the distance between an intron and a PTC. Two additional constructs were examined in which a spacer of either 147bp or 291bp was inserted at codon position 120 to lengthen the distance between the intron (at position 110) and the NMD-inducing PTC at position 140 (Fig 3A). We found that the presence of a spacer clearly suppresses the ability of the intron to enhance NMD. The level of mRNA of the initial reporter without a spacer (PTC140-Aivs) was ~27% of the PTC-less

control (Fig 3B, lanes 1-2). In contrast, neither of the spacer-containing constructs undergo NMD: the mRNA level of the shorter spacer (PTC140-Aivs-147) was 96% of the PTC- control, while it was ~110% of the longer spacer (PTC140-Aivs-291). The results indicate that an intron must be relatively close to a PTC for splicing to enhance NMD. The distance between the intron and the PTC was 90 nt in the NMD-sensitive construct, while it was 243 nt and 387 nt in the two longer constructs (Fig 3B).

### **Prp17 is required for splicing-dependent NMD and co-fractionates with monosomes**

To gain insight into what the mechanism that links splicing to NMD might be, we screened 33 viable *S. cerevisiae* strains containing deletions in known or predicted splicing factors as well as proteins predicted to interact with one of the upf proteins. These were tested along the three known upf deletion strains; all were isolated from the commercially available Yeast MATalpha collection (Supplementary Table 3 and Material and Methods). The strains were blindly relabeled and transformed with a centromeric plasmid construct expressing GFP with or without a PTC or C-ivs intron (Fig 4A). The intron-less reporters carrying PTC6 were used to examine splicing-independent NMD, while PTC140-Civs was used as a reporter of splicing-dependent NMD. By means of Northern blotting we identified six strains with an apparent NMD-suppression phenotype. Three of these correspond to *UPF1Δ*, *UPF2Δ* and *UPF3Δ*, as expected (Fig. 4 B-E); the others were deletions of *PRP17*, *CWC21* and *LSM6* (Fig. 4 F-H). Although the level of spliced mRNA is, as expected, lower than that of the intron-less reporter in some of the mutants, clearly, the presence of PTC140 does not reduce its level to the extent that it does in wild-type; thus indicating NMD suppression in these mutants. A similar NMD suppression phenotype was seen with the intron-less PTC6 reporter in all but one mutant. The exception was *PRP17Δ*, in which the level of the spliced PTC140 mRNA was comparable to the PTC-less control, while that of PTC6 was clearly unaffected, showing as strong NMD as in the wild-type strain (Fig 4F, lanes 3-4 vs. 1-2). Similar constructs carrying the A-ivs intron instead of C-ivs were also tested. Their analysis revealed similar mRNA expression patterns; both splicing-dependent and splicing-independent NMD was suppressed in *UPF1Δ* and *CWC21Δ* but, as shown above, in *PRP17Δ* only the level of the spliced PTC140 mRNA was increased (Supplementary Fig 1). The interpretation is that Prp17 might be selectively involved in linking splicing to NMD.

As NMD strictly depends on translation, we examined whether Prp17 associates with ribosomal fractions. Following standard whole-cell sucrose gradient fractionation, we found that a portion of GFP-tagged Prp17 co-sediments with ribosomal subunits and monosomes, and to a smaller extent, polysomes (Fig 5B); such distribution patterns parallel those of similarly tagged Upf1 and Upf2 (Fig 5C and 5D) but differ from those of Upf3p-GFP, which are also apparent in polysomal fractions (Fig 5E). Cwc21-GFP was instead detected only in lighter sub-ribosomal fractions, as expected (Fig 5F). Although we cannot exclude that sedimentation of Prp17 and other proteins examined is partially affected by GFP tagging, the data indicate that a fraction of Prp17 might associate with actively translated mRNA or ribosomal subunits directly.

Finally, we considered whether the enhancing effect of splicing on NMD might be an indirect consequence of increased translation efficiency of spliced mRNA. We generated reporters in which the firefly luciferase coding sequence was fused to that of GFP, which was either intron-less or carrying *Aivs* or *Civs* (Fig 6A). Level of mRNA and luciferase were quantified in parallel to estimate translation yield (Fig 6B-C). We found that the spliced mRNA deriving from reporter containing the *A-ivs* intron appears to be translated more efficiently in wild type and some of the mutant strains, yet translation yield of the construct with the *C-ivs* intron, which similarly enhanced NMD, increased only slightly in wild type and is reduced in some of the mutants (Fig 6C). Therefore, while spliced mRNA might be translated more efficiently in wild-type and some of the mutant strains to a variable extent, the effect does not correlate with either the extent of NMD or its suppression in the mutants. Specifically, translation yield in *PRP17Δ* is clearly similar between intron-containing and intron-less reporters and comparable to that in wild-type (Fig 6C).

## Discussion

As discussed, only nonsense mutations at the beginning of the gene lead to apparent NMD in *S. cerevisiae*, such polarity is not typically seen, or it is limited to the 3' terminal exon, in mammalian cells (16). Lack of polarity is linked to the presence of one or more introns downstream of a PTC which, via deposition of the EJC, is understood to trigger NMD regardless of the distance of the PTC from either end of the transcript in mammalian cells (25). There is no evidence of an EJC in *S. cerevisiae*, and out of the few genes that have introns (~5%), the vast majority (~97%) contain a single intron located very close to the start of the coding region (48). It was therefore envisaged that there would not be any mechanism linking splicing and NMD in this organism. On the contrary, here we have shown that inserting an intron in a gene harboring a late PTC causes apparent NMD in *S. cerevisiae* as well. We examined constructs with different introns, either upstream or downstream of a PTC and at different distances, and found that an intron can enhance NMD regardless of whether it is located before or after the PTC. One determinant of strong NMD appears to be the vicinity of the intron to the PTC, while another might be intron length. Of the three introns we examined, the most effective at enhancing NMD were the long *ACT1* and *CYH2* introns, whereas the least effective was the shortest *UBC4* intron. This first set of observations confirms what has been reported in *S. pombe* (30); it is also consistent with the report that splicing-dependent NMD appears to be independent of EJC deposition in the protozoan *Tetrahymena* (49); and shows that all eukaryotes are likely to have mechanism(s) linking splicing to translation and NMD.

The outstanding question is how these mechanism(s) operate. The lack of Y14 and MAGO homologues in *S. cerevisiae* makes it unlikely that an EJC-like complex can be assembled at splice junctions, for example by stabilization of eIF4AIII binding on mRNA via protein interactions other than those described for the EJC in mammalian cells (50). Moreover, eIF4AIII is likely to bind nascent RNA independently of splicing in yeast, as it has been reported for *Drosophila* (51). The co-sedimentation of Prp17 with ribosomal fractions and monosomes, could be interpreted as an indication that this protein remains associated with the mRNA after splicing and during nuclear export like the EJC, until the ribosome removes it in the initial round of translation in the cytoplasm. However, such a model fails to explain that an intron can also enhance NMD when located upstream of the PTC, as any complex

associated with the exon junction will have to be removed by the ribosome before reaching the PTC, given the diameter of the mRNA tunnel (52,53). Moreover, contrary to general expectations monosomal mRNA appear to be fully translated by a single ribosome in *S. cerevisiae*, rather than being at the initiation stage (54). While the role of Prp17 in the process remains to be defined, this protein appears to be specifically required for splicing-dependent NMD; unlike the two other splicing factors we have identified, for which the mutants NMD suppression phenotype might be a secondary consequence of other changes in either mRNA stability or splicing (55). Notably, Prp17 is thought to be involved in the second step of splicing (56,57); possibly of introns that, like those of *ACT1* and *CYH2*, are longer than average, based on some studies (58-60).

In summary, our data demonstrate that splicing can also enhance NMD in *S. cerevisiae* and suggest that a lack of nearby introns is the main factor that stops late PTCs from causing strong NMD in this organism, rather than proximity to PABPC (34); therefore further questioning what the mechanisms and significance of NMD in general are (9). The finding that Prp17 is only required for splicing-dependent NMD suggests that this is a mechanistically distinct process from standard cytoplasmic NMD, and we would like to propose that splicing-dependent NMD is caused by a direct contact that Prp17 mediates between the ribosome and the spliceosome (61).

## **Acknowledgments**

We thank Stephen Dove for help and support, and Michael Rosbash, He Feng, Alan Jacobson and Jean D. Beggs for providing reagents. We also thank Marija Petric and Anand Singh for critically reading the manuscript. This work was supported by the Wellcome Trust (9340/Z/09/Z) and BBSRC (BB/M022757/1) project grants to SB, and a grant from National Natural Science Foundation of China (NSFC, Grant No. 34171234) to JW.

## **Contributions**

Saverio Brogna (SB) and Jikai Wen (JW) conceived the study. JW performed most of the experiments. JW and Laetitia Marzi performed the mutants screening, JW and Jianming Wang performed the polysomal fractionation. Jinxin Ye made some of the mutant strains. SB and JW wrote the paper.

## **Competing financial interests**

The authors declare no competing financial interests.

## References

1. Muhlemann, O., Eberle, A.B., Stalder, L. and Zamudio Orozco, R. (2008) Recognition and elimination of nonsense mRNA. *Biochimica et Biophysica Acta (BBA) - Gene Regulatory Mechanisms*, **1779**, 538-549.
2. Chang, Y.F., Imam, J.S. and Wilkinson, M.F. (2007) The nonsense-mediated decay RNA surveillance pathway. *Annu Rev Biochem*, **76**, 51-74.
3. He, F. and Jacobson, A. (2015) Nonsense-Mediated mRNA Decay: Degradation of Defective Transcripts Is Only Part of the Story. *Annu Rev Genet*.
4. Fatscher, T., Boehm, V. and Gehring, N.H. (2015) Mechanism, factors, and physiological role of nonsense-mediated mRNA decay. *Cell Mol Life Sci*, **72**, 4523-4544.
5. Malabat, C., Feuerbach, F., Ma, L., Saveanu, C. and Jacquier, A. (2015) Quality control of transcription start site selection by nonsense-mediated-mRNA decay. *Elife*, **4**.
6. Lykke-Andersen, S. and Jensen, T.H. (2015) Nonsense-mediated mRNA decay: an intricate machinery that shapes transcriptomes. *Nat Rev Mol Cell Biol*, **16**, 665-677.
7. Muhlemann, O. and Jensen, T.H. (2011) mRNP quality control goes regulatory. *Trends Genet*, **28**, 70-77.
8. Leeds, P., Peltz, S.W., Jacobson, A. and Culbertson, M.R. (1991) The product of the yeast Upf1 gene is required for rapid turnover of messenger RNAs containing a premature translational termination codon. *Genes & development*, **5**, 2303-2314.
9. Brogna, S., McLeod, T. and Petric, M. (2016) The Meaning of NMD: Translate or Perish. *Trends Genet*, **32**, 395-407.
10. Zhang, J. and Maquat, L.E. (1996) Evidence that the decay of nucleus-associated nonsense mRNA for human triosephosphate isomerase involves nonsense codon recognition after splicing. *RNA*, **2**, 235-243.
11. Carter, M.S., Li, S. and Wilkinson, M.F. (1996) A splicing-dependent regulatory mechanism that detects translation signals. *The EMBO journal*, **15**, 5965-5975.
12. Zhang, J., Sun, X., Qian, Y., LaDuca, J.P. and Maquat, L.E. (1998) At least one intron is required for the nonsense-mediated decay of triosephosphate isomerase mRNA: a possible link between nuclear splicing and cytoplasmic translation. *Mol Cell Biol*, **18**, 5272-5283.
13. Thermann, R., NeuYilik, G., Deters, A., Frede, U., Wehr, K., Hagemeier, C., Hentze, M.W. and Kulozik, A.E. (1998) Binary specification of nonsense codons by splicing and cytoplasmic translation. *Embo J*, **17**, 3484-3494.
14. Singh, G., Rebbapragada, I. and Lykke-Andersen, J. (2008) A competition between stimulators and antagonists of Upf complex recruitment governs human nonsense-mediated mRNA decay. *PLoS Biol*, **6**, e111.
15. Silva, A.L., Ribeiro, P., Inacio, A., Liebhaber, S.A. and Romao, L. (2008) Proximity of the poly(A)-binding protein to a premature termination codon inhibits mammalian nonsense-mediated mRNA decay. *RNA*, **14**, 563-576.

16. Eberle, A.B., Stalder, L., Mathys, H., Orozco, R.Z. and Muhlemann, O. (2008) Posttranscriptional gene regulation by spatial rearrangement of the 3' untranslated region. *PLoS Biol*, **6**, e92.
17. Buhler, M., Steiner, S., Mohn, F., Paillusson, A. and Muhlemann, O. (2006) EJC-independent degradation of nonsense immunoglobulin-mu mRNA depends on 3' UTR length. *Nat Struct Mol Biol*, **13**, 462-464.
18. Mendell, J.T., Sharifi, N.A., Meyers, J.L., Martinez-Murillo, F. and Dietz, H.C. (2004) Nonsense surveillance regulates expression of diverse classes of mammalian transcripts and mutes genomic noise. *Nat Genet*, **36**, 1073-1078.
19. Hurt, J.A., Robertson, A.D. and Burge, C.B. (2013) Global analyses of UPF1 binding and function reveal expanded scope of nonsense-mediated mRNA decay. *Genome Res*, **23**, 1636-1650.
20. Lindeboom, R.G.H., Supek, F. and Lehner, B. (2016) The rules and impact of nonsense-mediated mRNA decay in human cancers. *Nature Genetics*, **48**, 1112-1118.
21. Le Hir, H., Izaurralde, E., Maquat, L.E. and Moore, M.J. (2000) The spliceosome deposits multiple proteins 20-24 nucleotides upstream of mRNA exon-exon junctions. *Embo J*, **19**, 6860-6869.
22. Le Hir, H., Moore, M.J. and Maquat, L.E. (2000) Pre-mRNA splicing alters mRNP composition: evidence for stable association of proteins at exon-exon junctions. *Genes Dev*, **14**, 1098-1108.
23. Le Hir, H., Sauliere, J. and Wang, Z. (2016) The exon junction complex as a node of post-transcriptional networks. *Nat Rev Mol Cell Biol*, **17**, 41-54.
24. Nagy, E. and Maquat, L.E. (1998) A rule for termination-codon position within intron-containing genes: when nonsense affects RNA abundance. *Trends Biochem Sci*, **23**, 198-199.
25. Maquat, L.E. (2004) Nonsense-mediated mRNA decay: splicing, translation and mRNP dynamics. *Nat Rev Mol Cell Biol*, **5**, 89-99.
26. Zhang, Y. and Sachs, M.S. (2015) Control of mRNA Stability in Fungi by NMD, EJC and CBC Factors Through 3'UTR Introns. *Genetics*, **200**, 1133-1148.
27. Carter, M.S., Li, S.L. and Wilkinson, M.F. (1996) A splicing dependent regulatory mechanism that detects translation signals. *Embo J*, **15**, 5965-5975.
28. Wang, J., Gudikote, J.P., Olivas, O.R. and Wilkinson, M.F. (2002) Boundary-independent polar nonsense-mediated decay. *EMBO reports*, **3**, 274-279.
29. Brogna, S. and Wen, J. (2009) Nonsense-mediated mRNA decay (NMD) mechanisms. *Nat Struct Mol Biol*, **16**, 107-113.
30. Wen, J. and Brogna, S. (2010) Splicing-dependent NMD does not require the EJC in *Schizosaccharomyces pombe*. *The Embo Journal*, **29**, 1537-1551.
31. Losson, R. and Lacroute, F. (1979) Interference of nonsense mutations with eukaryotic messenger RNA stability. *Proc. Natl. Acad. Sci. USA*, **76**, 5134-5137.

32. Peltz, S.W., Brown, A.H. and Jacobson, A. (1993) Messenger RNA destabilization triggered by premature translational termination depends on at least 3 cis-acting sequence elements and one trans-acting factor. *Genes & development*, **7**, 1737-1754.
33. Cao, D. and Parker, R. (2003) Computational modeling and experimental analysis of nonsense-mediated decay in yeast. *Cell*, **113**, 533-545.
34. Amrani, N., Ganesan, R., Kervestin, S., Mangus, D.A., Ghosh, S. and Jacobson, A. (2004) A faux 3'-UTR promotes aberrant termination and triggers nonsense-mediated mRNA decay. *Nature*, **432**, 112-118.
35. Juneau, K., Miranda, M., Hillenmeyer, M.E., Nislow, C. and Davis, R.W. (2006) Introns regulate RNA and protein abundance in yeast. *Genetics*, **174**, 511-518.
36. Kupfer, D.M., Drabenstot, S.D., Buchanan, K.L., Lai, H.S., Zhu, H., Dyer, D.W., Roe, B.A. and Murphy, J.W. (2004) Introns and splicing elements of five diverse fungi. *Eukaryot Cell*, **3**, 1088-1100.
37. Lin, R.J., Newman, A.J., Cheng, S.C. and Abelson, J. (1985) Yeast mRNA splicing in vitro. *J Biol Chem*, **260**, 14780-14792.
38. Ares, M., Grate, L. and Pauling, M.H. (1999) A handful of intron-containing genes produces the lion's share of yeast mRNA. *Rna-a Publication of the Rna Society*, **5**, 1138-1139.
39. Wahl, M.C., Will, C.L. and Luhrmann, R. (2009) The Spliceosome: Design Principles of a Dynamic RNP Machine. *Cell*, **136**, 701-718.
40. Kuperwasser, N., Brogna, S., Dower, K. and Rosbash, M. (2004) Nonsense-mediated decay does not occur within the yeast nucleus. *RNA*, **10**, 1907-1915.
41. Soni, R., Carmichael, J.P. and Murray, J.A. (1993) Parameters affecting lithium acetate-mediated transformation of *Saccharomyces cerevisiae* and development of a rapid and simplified procedure. *Curr Genet*, **24**, 455-459.
42. Ausubel, F.A., Brent, R., Kingston, R.E., Moore, D.D., Seidman, J.G., Smith, J.A. and K., S. (1996) *Current Protocols in Molecular Biology*. John Wiley & Sons, New York.
43. Yang, H., McLeese, J., Weisbart, M., Dionne, J.L., Lemaire, I. and Aubin, R.A. (1993) Simplified high throughput protocol for northern hybridization. *Nucleic Acids Res*, **21**, 3337-3338.
44. Abelson, J., Blanco, M., Ditzler, M.A., Fuller, F., Aravamudhan, P., Wood, M., Villa, T., Ryan, D.E., Pleiss, J.A., Maeder, C. *et al.* (2010) Conformational dynamics of single pre-mRNA molecules during in vitro splicing. *Nature structural & molecular biology*, **17**, 504-512.
45. Lesser, C.F. and Guthrie, C. (1993) Mutational analysis of pre-mRNA splicing in *Saccharomyces cerevisiae* using a sensitive new reporter gene, CUP1. *Genetics*, **133**, 851-863.
46. Swida, U., Thuroff, E. and Kaufer, N.F. (1986) Intron mutations that affect the splicing efficiency of the CYH2 gene of *Saccharomyces cerevisiae*. *Molecular & general genetics : MGG*, **203**, 300-304.

47. Klinz, F.J. and Gallwitz, D. (1985) Size and position of intervening sequences are critical for the splicing efficiency of pre-mRNA in the yeast *Saccharomyces cerevisiae*. *Nucleic Acids Res*, **13**, 3791-3804.
48. Schreiber, K., Csaba, G., Haslbeck, M. and Zimmer, R. (2015) Alternative Splicing in Next Generation Sequencing Data of *Saccharomyces cerevisiae*. *Plos One*, **10**.
49. Tian Miao, W.Y., Jing Zhang, Huai Dang, Xingyi Lu, Chengjie Fu, Miao Wei. (2017) Nonsense-mediated mRNA decay in *Tetrahymena* is EJC independent and requires a protozoa-specific nuclease. *Nucleic Acids Res* **gkx256**.
50. Ballut, L., Marchadier, B., Baguet, A., Tomasetto, C., Seraphin, B. and Le Hir, H. (2005) The exon junction core complex is locked onto RNA by inhibition of eIF4AIII ATPase activity. *Nat Struct Mol Biol*, **12**, 861-869.
51. Choudhury, S.R., Singh, A.K., McLeod, T., Blanchette, M., Jang, B.Y., Badenhorst, P., Kanhere, A. and Brogna, S. (2016) Exon junction complex proteins bind nascent transcripts independently of pre-mRNA splicing in *Drosophila melanogaster*. *Elife*, **5**.
52. Yusupova, G.Z., Yusupov, M.M., Cate, J.H. and Noller, H.F. (2001) The path of messenger RNA through the ribosome. *Cell*, **106**, 233-241.
53. Qin, P.W., Yu, D.M., Zuo, X.B. and Cornish, P.V. (2014) Structured mRNA induces the ribosome into a hyper-rotated state. *EMBO reports*, **15**, 185-190.
54. Heyer, E.E. and Moore, M.J. (2016) Redefining the Translational Status of 80S Monosomes. *Cell*, **164**, 757-769.
55. Tharun, S., He, W.H., Mayes, A.E., Lennertz, P., Beggs, J.D. and Parker, R. (2000) Yeast Sm-like proteins function in mRNA decapping and decay. *Nature*, **404**, 515-518.
56. Will, C.L. and Luhrmann, R. (2011) Spliceosome structure and function. *Cold Spring Harb Perspect Biol*, **3**.
57. Jones, M.H., Frank, D.N. and Guthrie, C. (1995) Characterization and functional ordering of Slu7p and Prp17p during the second step of pre-mRNA splicing in yeast. *Proc Natl Acad Sci U S A*, **92**, 9687-9691.
58. Sapra, A.K., Arava, Y., Khandelua, P. and Vijayraghavan, U. (2004) Genome-wide analysis of Pre-mRNA splicing - Intron features govern the requirement for the second-step factor, Prp17 in *Saccharomyces cerevisiae* and *Schizosaccharomyces pombe*. *Journal of Biological Chemistry*, **279**, 52437-52446.
59. Clark, T.A., Sugnet, C.W. and Ares, M. (2002) Genomewide analysis of mRNA processing in yeast using splicing-specific microarrays. *Science*, **296**, 907-910.
60. Kawashima, T., Pellegrini, M. and Chanfreau, G.F. (2009) Nonsense-mediated mRNA decay mutes the splicing defects of spliceosome component mutations. *Rna-a Publication of the Rna Society*, **15**, 2236-2247.
61. Zhang, X.F., Yan, C.Y., Hang, J., Finci, L.I., Lei, J.L. and Shi, Y.G. (2017) An Atomic Structure of the Human Spliceosome. *Cell*, **169**, 918-+.

## Figure Legends

### Figure 1. Splicing enhanced NMD in *S. cerevisiae*.

(A) Schematic maps of NMD reporters. The GFP gene was cloned into pRS304, which is regulated by promoter and terminator of *S. cerevisiae* *TDH3* gene. The schematic of the intron-less constructs is on top, while below is that of the intron-containing constructs containing one of the three *S. cerevisiae* introns, labeled *ivs* ; A-*ivs*, C-*ivs* and U-*ivs* which derive from the *ACT1*, *CYH2* and *UBC4* genes, respectively. (B) From left to right panel – micrographs showing GFP fluorescence of cells transformed with indicated reporters; the right panel shows a PTC+ control not expected to produce GFP fluorescence. Images were taken with an inverted fluorescence microscope (Nikon Ti ). (C-F) Northern blot analysis of mRNA levels in cells transformed with the indicated NMD reporters. Top panels show hybridization of a GFP-specific probe, the bottom panel shows a probe specific for the ribosomal protein L32 mRNA (Rpl32), as a loading control. The values below each lane are percentages with standard variations of the level of GFP mRNA relative to that of the corresponding PTC-less control, lane 1 in each panel. Bands intensities were quantified using a phosphorimager and divided by the Rpl32 band intensity in the same blot (see Materials and methods). (G-H) Similar Northern blot analysis carried out in *UPF2Δ* and (K-N) *UPF1Δ*. All of the experiments were repeated three times.

### Figure 2. The splicing enhanced NMD is observed in endogenous genes.

(A) Schematic maps of NMD reporters expressing two endogenous intron-containing genes, *CYH2* and *Rpl11B*, and corresponding cDNA derivatives lacking the intron. A DNA fragment from *Drosophila melanogaster* *Adh* gene (*DmA*) was fused to the 5' end of the constructs to allow detection by Northern blotting. (B) Northern blotting detection of *CYH2* (top left panel) and *RPL11B* transcripts (top right panel); corresponding bottom panels show Rpl32 mRNA (C). Similar analysis as above in *UPF2Δ*. All of the experiments were repeated three times.

### Figure 3. Lengthening the distance between an intron and a PTC abolishes splicing-dependent NMD.

(A) Schematic maps of NMD reporters carrying different spacer inserts between PTC140 and the intron. The two spacers, 147 bp and 291 bp, were inserted at codon position 120. (B)

Northern blotting analysis of GFP transcripts (top panel); the bottom panel shows the *Rpl32* signal used as a loading control. (C) Same as in B in *UPF2Δ* transformants. All of the experiments were repeated three times.

**Figure 4. Deletion of Prp17 specifically suppresses splicing-dependent NMD.**

(A) Schematic maps of the gene reporters used in the screening for splicing and other factors that might be involved in NMD. (B-H) Northern blot analysis of the reporters expression carried out in wild type (*BY4742*) (B), *UPF1Δ* (C), *UPF2Δ* (D), *UPF3Δ* (E), *PRP17Δ* (F), *CWC21Δ* (G) and *LSM6Δ* (H). Top panels show GFP hybridization signal; the bottom panels show those of the normalization control *Rpl32B* mRNA. All the experiments were repeated three times.

**Figure 5. Prp17 co-sediments with ribosomal fractions.**

(A) Western blotting of strains expressing Prp17 and other indicated GFP-tagged proteins, using an anti-GFP polyclonal antibody. (B) Absorbance profile (OD<sub>254</sub>) following sucrose gradient sedimentation of the whole-cell extract from a strain expressing Prp17-GFP. Fractions containing 40S, 60S, 80S and polysomes are labeled. The panel below shows Western blotting of the whole protein-extract from each fraction using the GFP antibody. (C-F) Similar experiments using strains expressing GFP-tagged Upf1 (C), Upf2 (D), Upf3 (E) and Cwc21 (F).

**Figure 6. Introns have variable effects on translation yield.**

(A) Diagram of the GFP reporters: intronless GFP (top), GFP split with either *ACT1* or *CYH2* intron (below), both fused with firefly luciferase at the carboxyl terminal. (B). The three plasmid constructs were transformed into wild type or *UPF1Δ*, *UPF2Δ*, *UPF3Δ*, *PRP17Δ*, *CWC21Δ* or *LSM6Δ*. Relative levels of GFP mRNA were quantified by qRT-PCR using primers spanning the exons junction specific for the spliced transcript, from equal amounts of total-RNA (see Material and Methods). Quantifications are based on three separate experiments. (C) Luciferase activities measured in aliquots of the same cultures used for the mRNA

quantification in B. Luciferase relative light units were normalized to mRNA levels and are shown as means of three measurements with standard deviations.

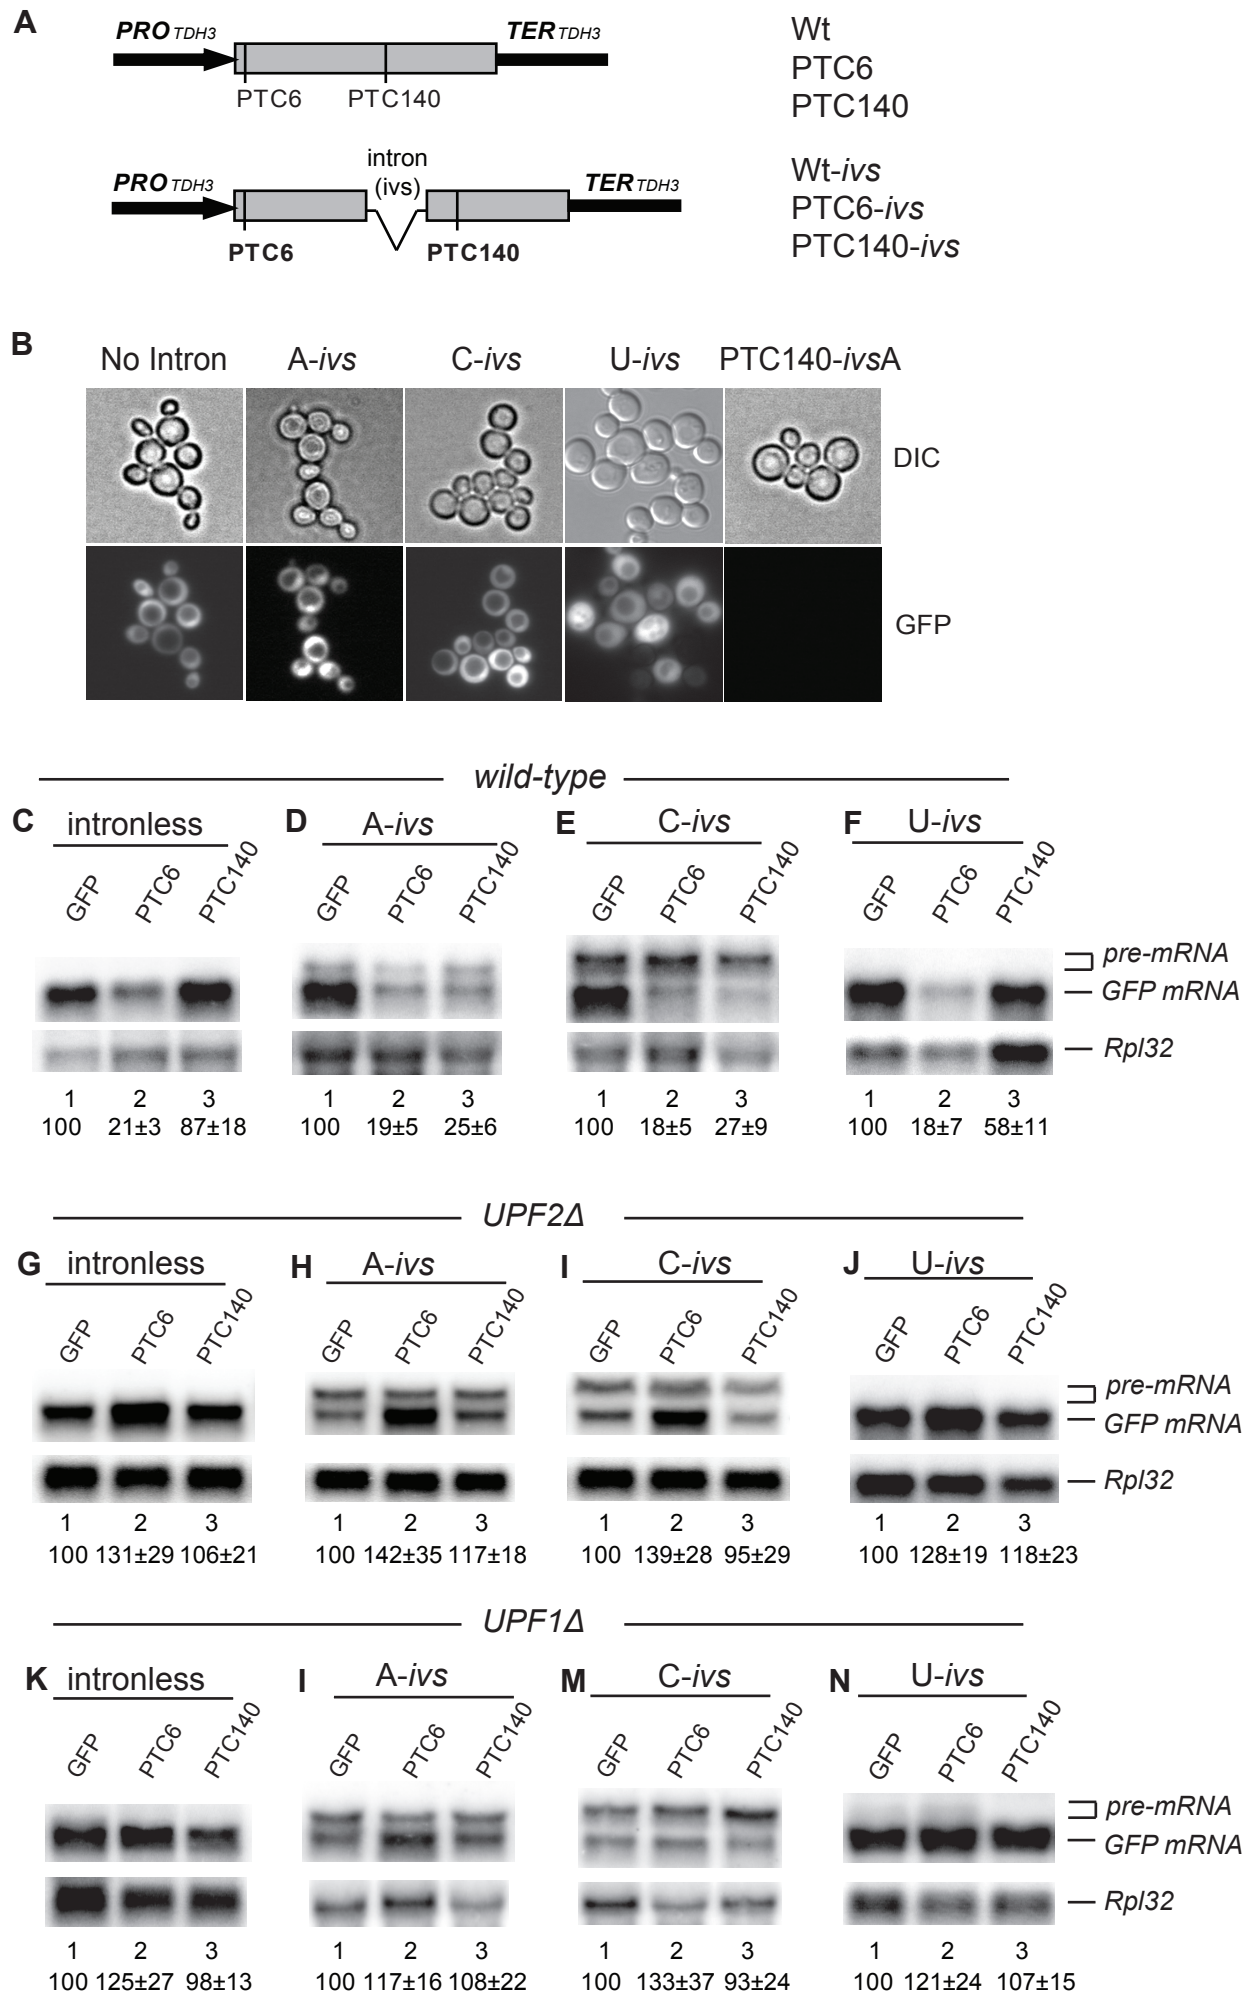

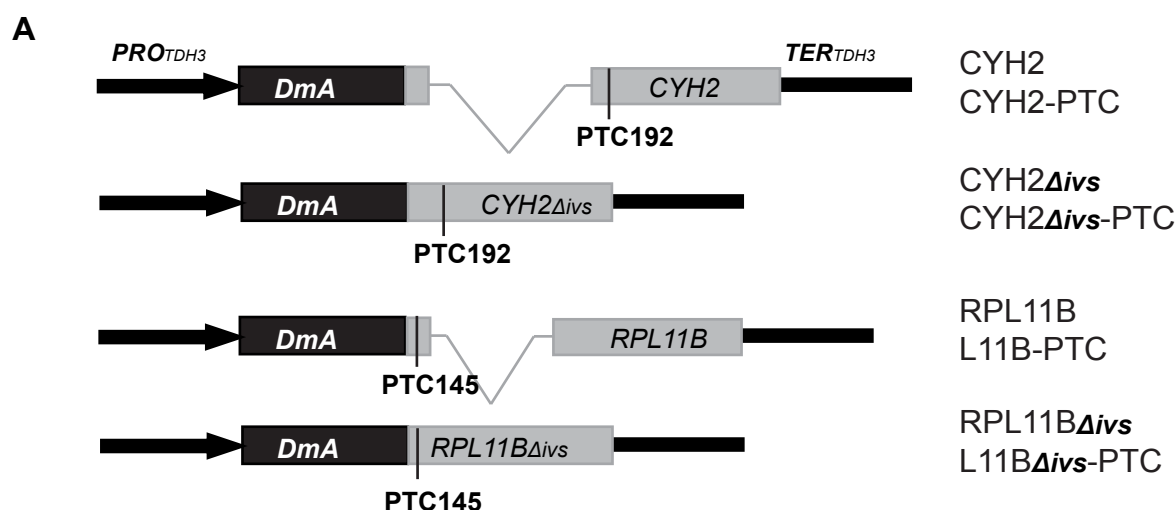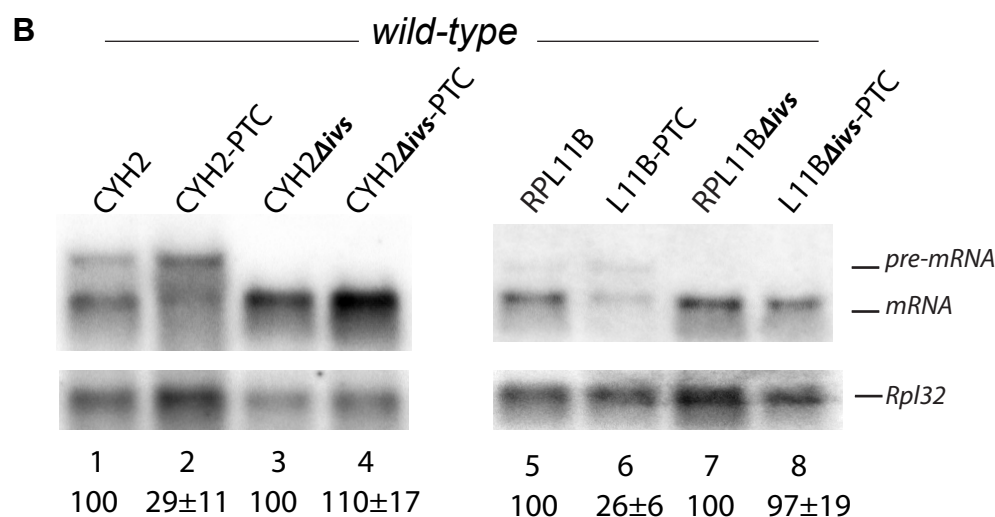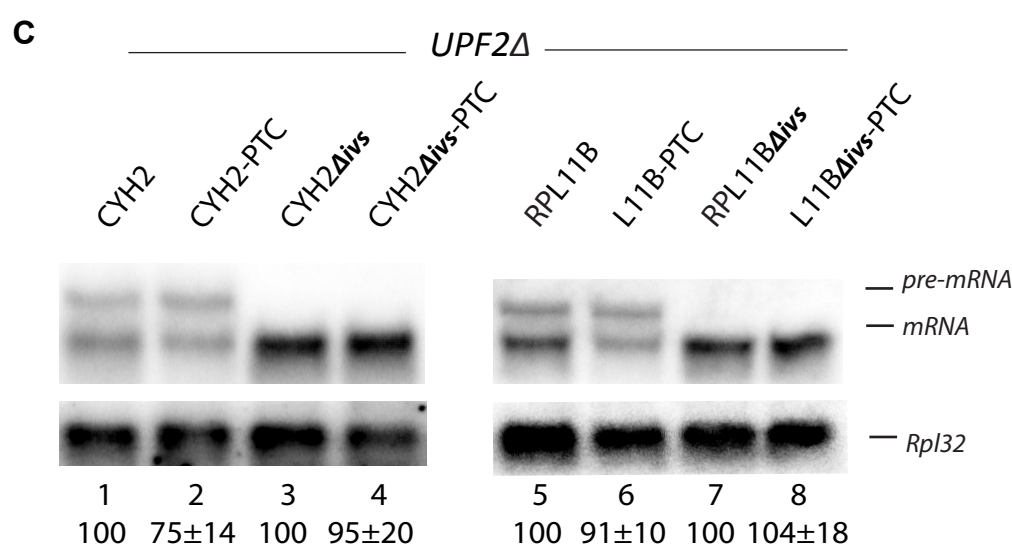

**A**

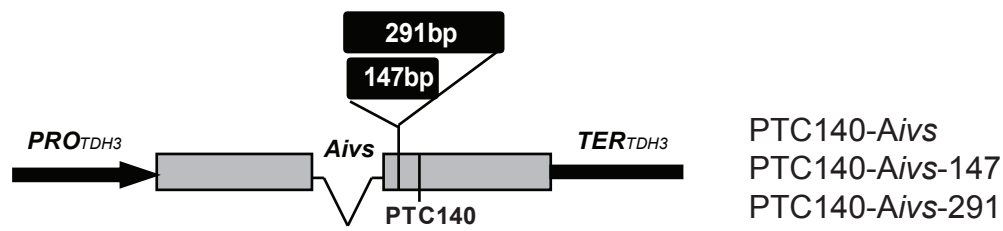

**B**

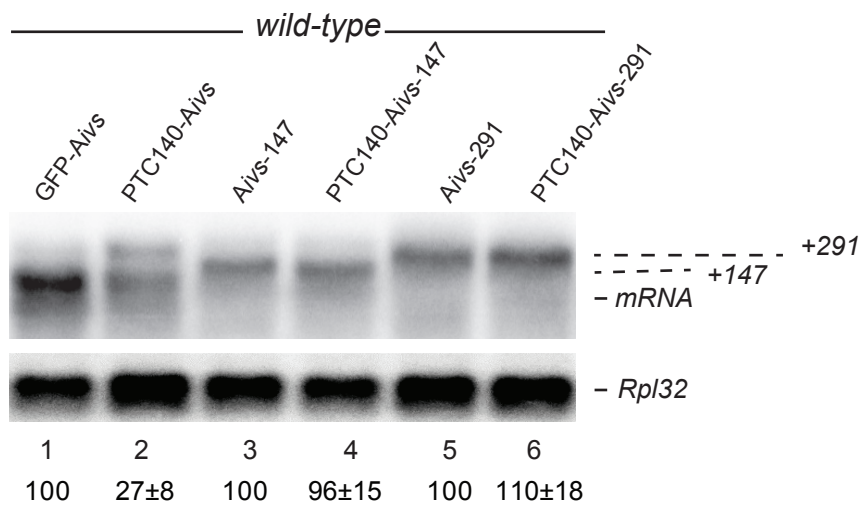

**C**

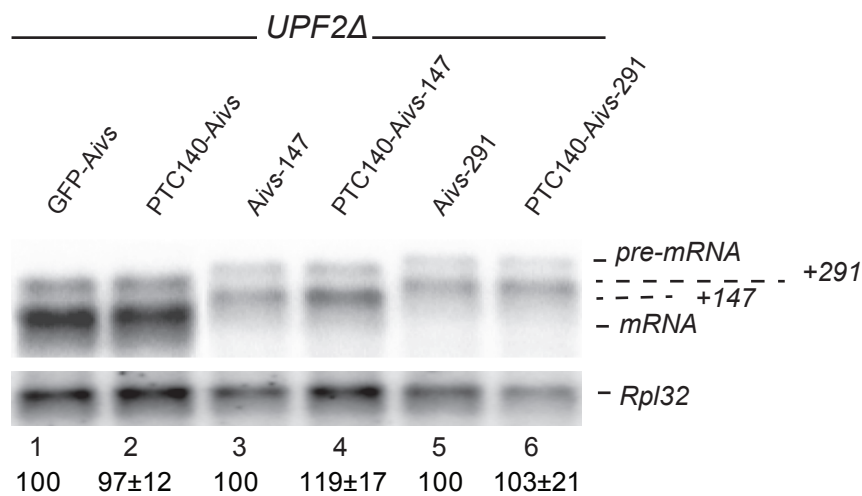

Fig. 4, J. Wen et al.

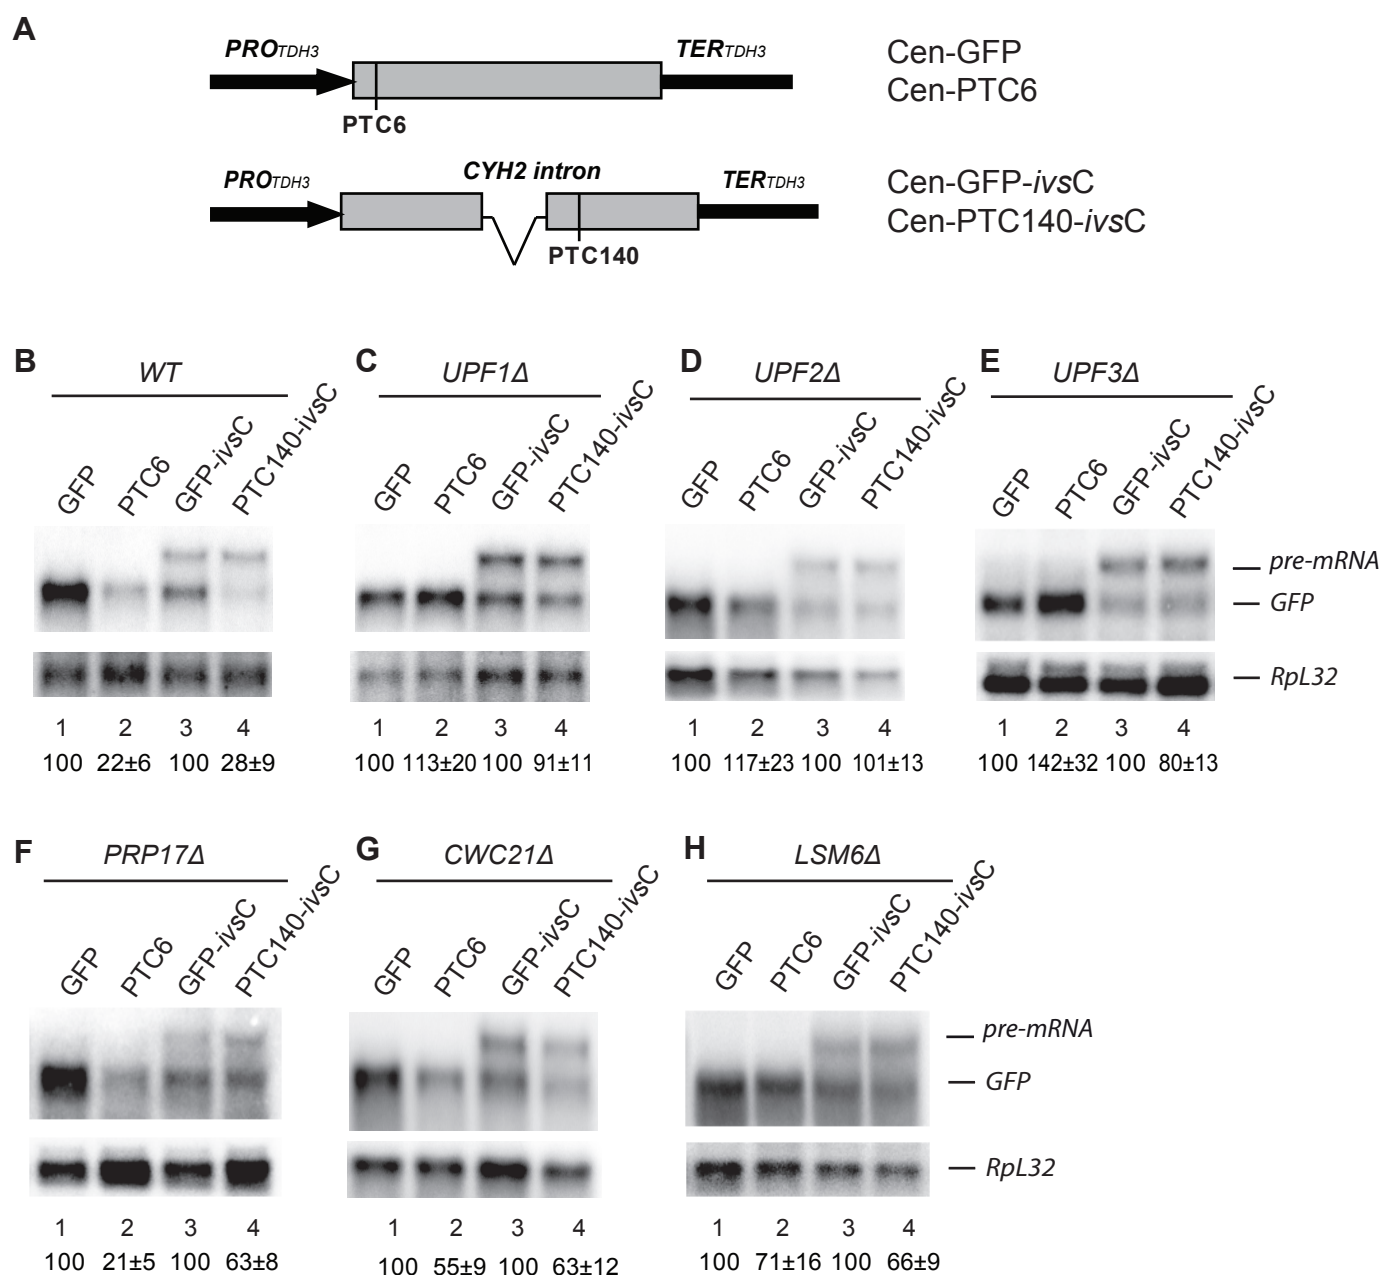

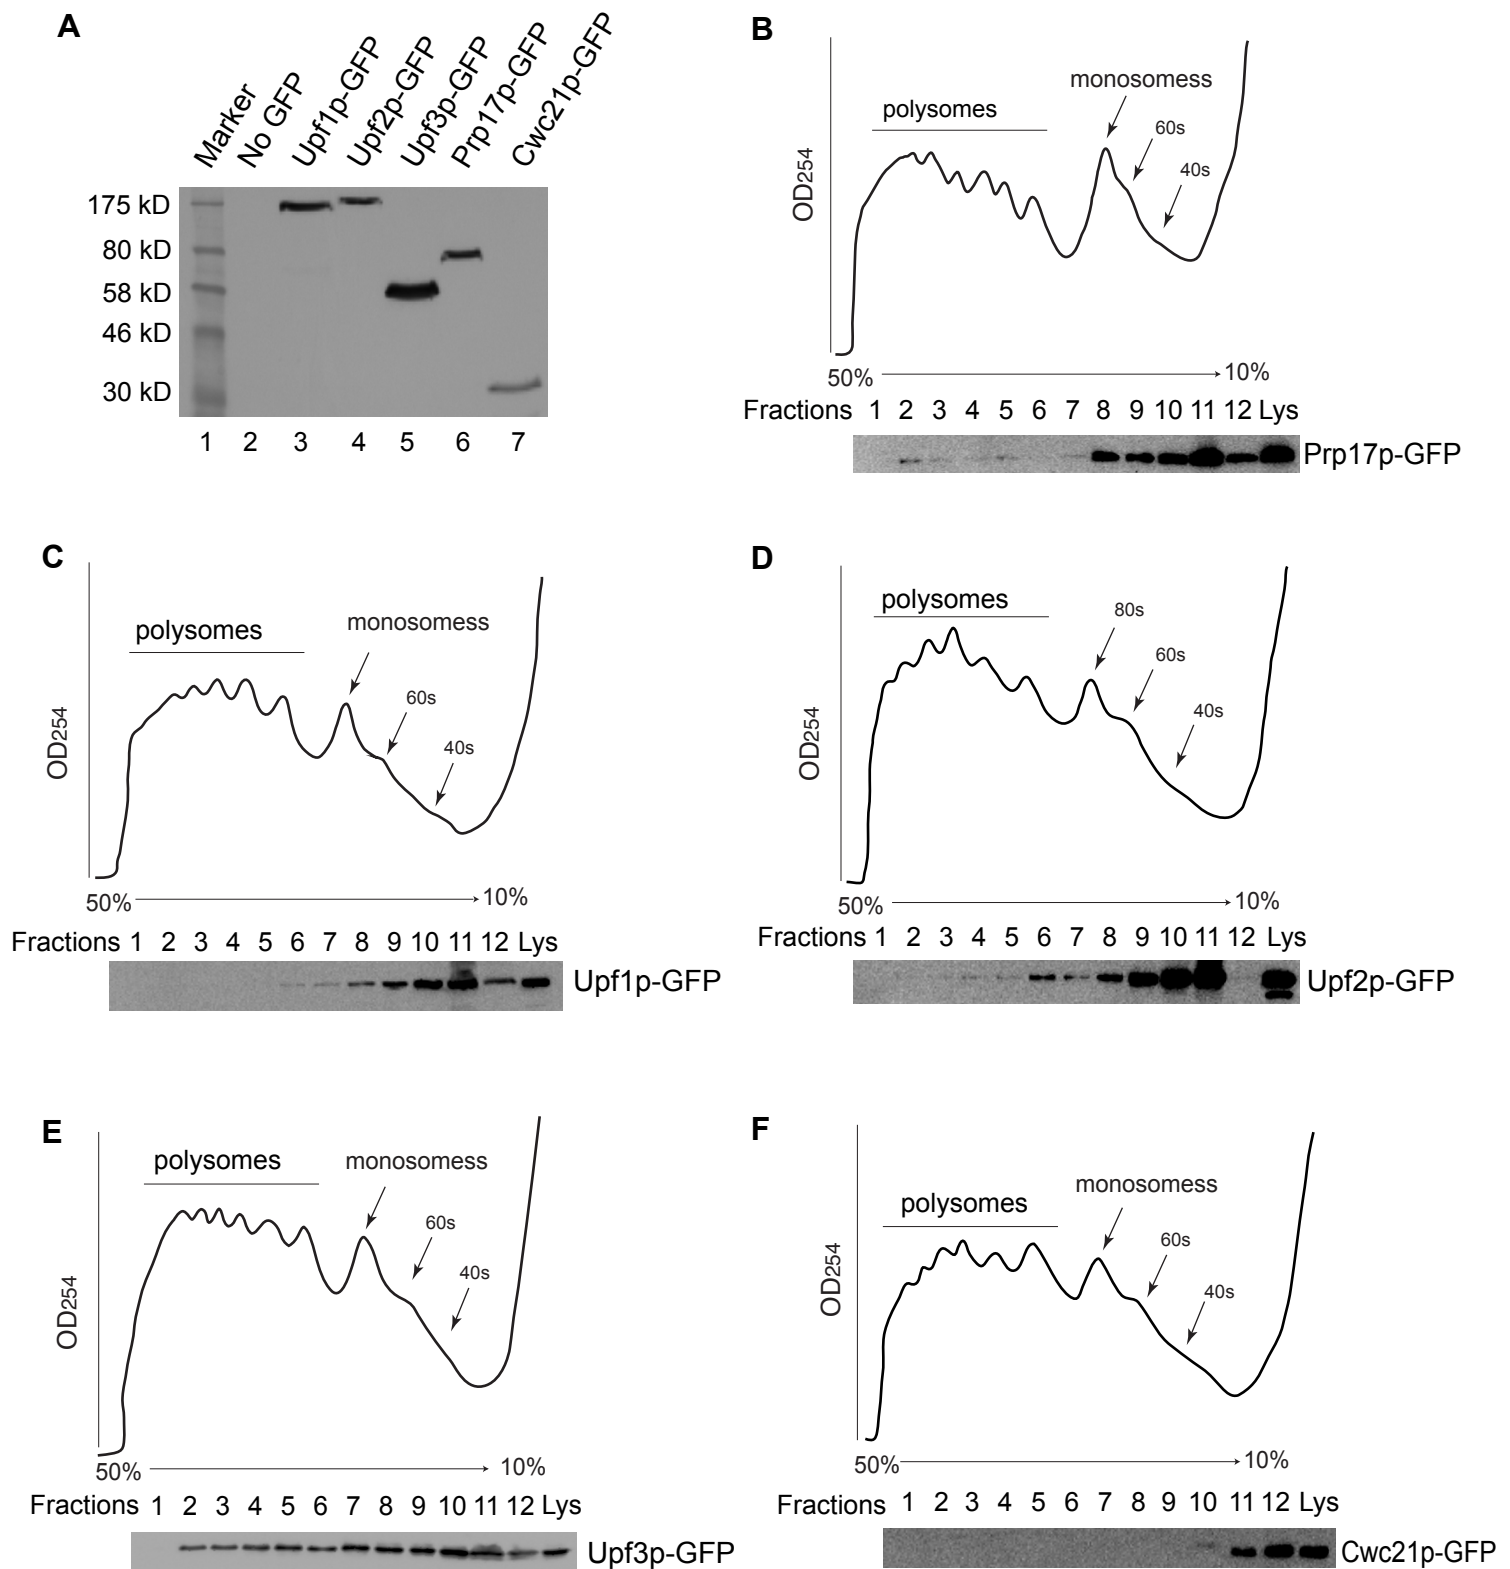

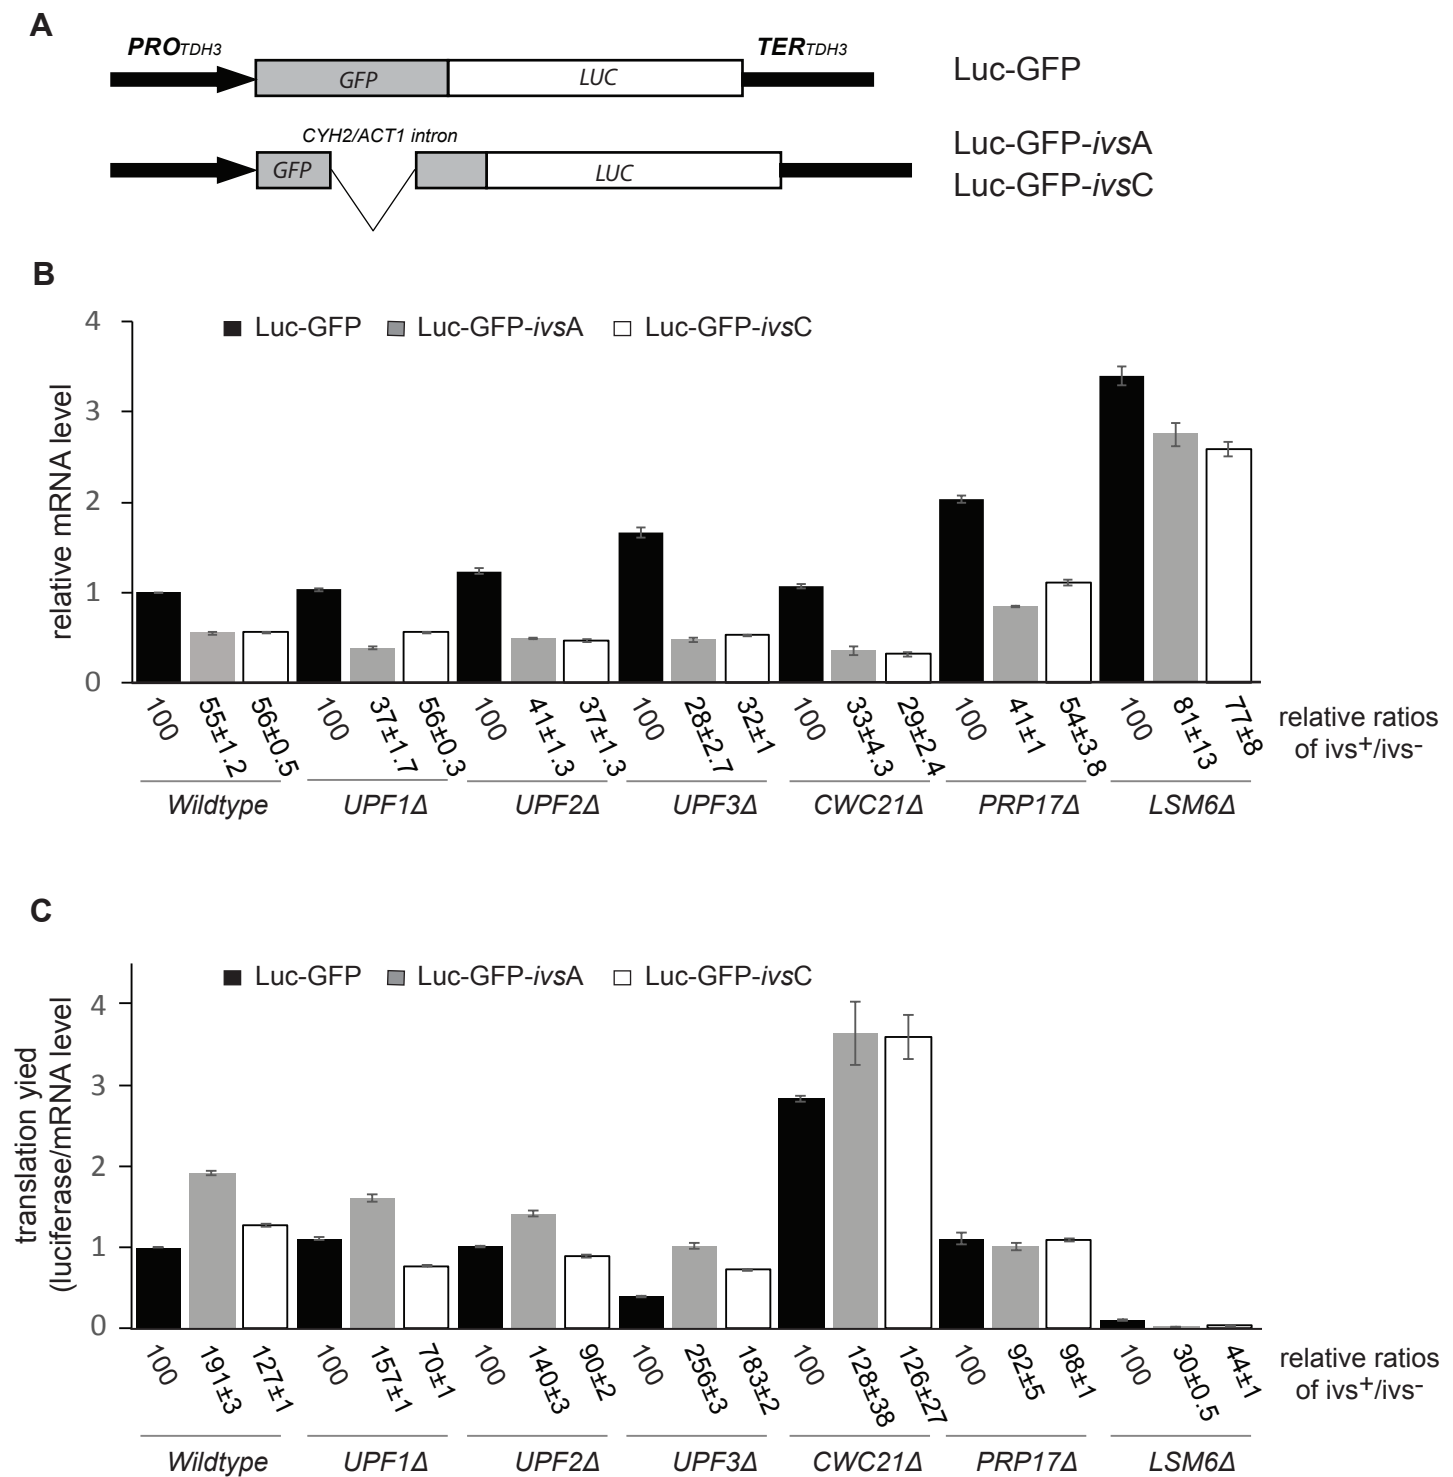

Wen et al.

Supplementary information.

Three tables and one figure.

### Supplementary Table 1. Strains used in this study

| Strains name   | genotype                                                                                                                               |
|----------------|----------------------------------------------------------------------------------------------------------------------------------------|
| W303a          | <i>MATa ade2-1 trp1-1 can1-100 leu2-3,112 his3-11,15 ura3-1</i>                                                                        |
| UPF1 $\Delta$  | <i>MATa ade2-1 trp1-1 can1-100 leu2-3,112 his3-11,15 ura3-1</i><br><i>upf1::HIS3</i>                                                   |
| UPF2 $\Delta$  | <i>MATa ade2-1 trp1-1 can1-100 leu2-3,112 his3-11,15 ura3-1</i><br><i>upf2::HIS3</i>                                                   |
| BY4742         | <i>MATa his3<math>\Delta</math>1 leu2<math>\Delta</math>0 lys2<math>\Delta</math>0 ura3<math>\Delta</math>0</i>                        |
| CWC21 $\Delta$ | <i>MATa ade2-1 trp1-1 can1-100 leu2-3,112 his3-11,15 ura3-1</i><br><i>cwc21::KanMX6</i>                                                |
| PRP17 $\Delta$ | <i>MATa ade2-1 trp1-1 can1-100 leu2-3,112 his3-11,15 ura3-1</i><br><i>prp17::KanMX6</i>                                                |
| UPF1-GFP       | <i>MATa his3<math>\Delta</math>1 leu2<math>\Delta</math>0 met15<math>\Delta</math>0 ura3<math>\Delta</math>0 upf1::upf1-GFP-HIS3</i>   |
| UPF2-GFP       | <i>MATa his3<math>\Delta</math>1 leu2<math>\Delta</math>0 met15<math>\Delta</math>0 ura3<math>\Delta</math>0 upf2::upf2-GFP-HIS3</i>   |
| UPF3-GFP       | <i>MATa his3<math>\Delta</math>1 leu2<math>\Delta</math>0 met15<math>\Delta</math>0 ura3<math>\Delta</math>0 upf3::upf3-GFP-HIS3</i>   |
| PRP17-GFP      | <i>MATa his3<math>\Delta</math>1 leu2<math>\Delta</math>0 met15<math>\Delta</math>0 ura3<math>\Delta</math>0 prp17::prp17-GFP-HIS3</i> |
| CWC21-GFP      | <i>MATa his3<math>\Delta</math>1 leu2<math>\Delta</math>0 met15<math>\Delta</math>0 ura3<math>\Delta</math>0 cwc21::cwc21-GFP-HIS3</i> |
| BY4741         | <i>MATa his3<math>\Delta</math>1 leu2<math>\Delta</math>0 met15<math>\Delta</math>0 ura3<math>\Delta</math>0</i>                       |

### Supplementary Table 2. Primers in this study

| Primer names  | DNA sequence (5' to 3')                                                                                 |
|---------------|---------------------------------------------------------------------------------------------------------|
| Act.ivs.for   | GTATGTTCTAGCGCTTGCAC                                                                                    |
| Act.ivs.rev   | CTAAACATATAATATAGCAAC                                                                                   |
| Cyh.ivs.for   | GTATGTAGTTCCATTTGGAAG                                                                                   |
| Cyh.ivs.rev   | CTGTACAAAAAATATTGTAATG                                                                                  |
| Uivs.full.fow | GTATGTCTAAAGTTATGGCCACGTTTCAAATGCGTG<br>CTTTTTTTTTTAAACTTATGCTCTTATTTACTAACAA<br>AATCAACATGCTATTGAACTAG |
| Uivs.full.rev | CTAGTTCAATAGCATGTTGATTTTGTAGTAAATAAG<br>AGCATAAGTTTTAAAAAAAAGCACGCATTTGAAAC                             |

|                 |                                       |
|-----------------|---------------------------------------|
|                 | GTGGCCATAACTTTAGACATAC                |
| ScL11b.P145.fow | CCCCGGATCCTCCACTGAATAAACTGTTCAATCTG   |
| ScL11b.wt.fow   | CCCCGGATCCTCCACTGAATTAAGTGTTCATCTG    |
| ScL11b.rev      | CCCCGTCGACTTAAAATTTAGCAAATTGCTTGTGG   |
|                 | CCCCGGATCCCCTTCCAGATTCACCTAAGACTAGAAA |
| Scyh2.wt.fow    | GCAC                                  |
| Scyh2.rev       | CCCCGTCGACTTAAGCGATCAATTCAACAACACC    |
| Scyh2.P192.rev  | GTTGACCACCTTACATACCTCTACCACCG         |
| Scyh2.P192.fow  | GGTAGAGGTATGTAAGGTGGTCAACATCACCACAG   |
| Sc.132.fow      | TACCTCACCCAAAGATTGTC                  |
| Sc.132.rev      | GGTTTCCAAATCCTTAACG                   |
| Adh.Bgl.fow     | AGTCCAGATCTATGTCGTTTACTTTGACCAACAAG   |
| Adh.Bam.rev     | CTTTGAAGATAAAGAGGATCCAATGTTGCAGATGAT  |
| F.Luc.fow       | CTTGAGCCTAGGTACCCATACGATGTTCTCTGA     |
| F.Luc147.rev    | TTTGTACCTAGGCTCGACCAGGATGGGCAC        |
| F.Luc291.rev    | TTGGTTCCTAGGGGTCAGGGTGGTCACGAG        |
| GFP.Q.fow       | GAGTTGTCCCAATTCTTGTT                  |
| GFP.Qs.rev      | TTGACTTCAGCACGTGTCTT                  |

**Supplementary Table 3. Non-essential splicing mutants and proteins predicted to interact with known NMD factors**

| BY4742 strains with deletions | protein name |
|-------------------------------|--------------|
| YHR086W                       | Nam8p        |
| YBR119W                       | Mud1p        |
| YPL213W                       | Lea1p        |
| YIR009W                       | Msl1p        |
| YHR156C                       | Snu40p       |
| YOR308C                       | Snu66p       |
| YNL147W                       | LSm7p        |
| YDR378C                       | LSm6p        |

---

|         |         |
|---------|---------|
| YGL174W | Bud13p  |
| YLR016C | Pml1p   |
| YJR050W | Isy1p   |
| YJK138C | Tif2p   |
| YDL160C | Dhh1p   |
| YDR206W | Ebs1p   |
| YPR057W | Brr1p   |
| YGR129W | Syf2p   |
| YPR101W | Snt309p |
| YBR188C | Ntc20p  |
| YBR065C | Ecm2p   |
| YDR163W | Cwc15p  |
| YPR152C | Urn1p   |
| YDR482C | Cwc21p  |
| YGR006W | Prp18p  |
| YMR125W | Sto1p   |
| YPL178W | Cbc2p   |
| YMR080C | Upf1p   |
| YHR072C | Upf2p   |
| YGR072W | Upf3p   |
| YGL246W | Rai1p   |
| YKR059W | Tif1p   |
| YDR363W | Esc2p   |
| YPL064C | Cwc27p  |
| YDR364C | Prp17p  |

---

## **Supplementary figure legend**

### **Supplementary Figure 1. Prp17p is required for splicing enhanced NMD in the Aivs reporter.**

(A) Schematic maps of the NMD reporters used in the deletion mutants screening for novel NMD mutants. (B-E) RNA analysis carried out in different yeast strains by Northern blotting. The top panel shows the GFP mRNA transcripts, the bottom panel shows the normalization control *Rpl32B* mRNA. All of the experiments were repeated three times.

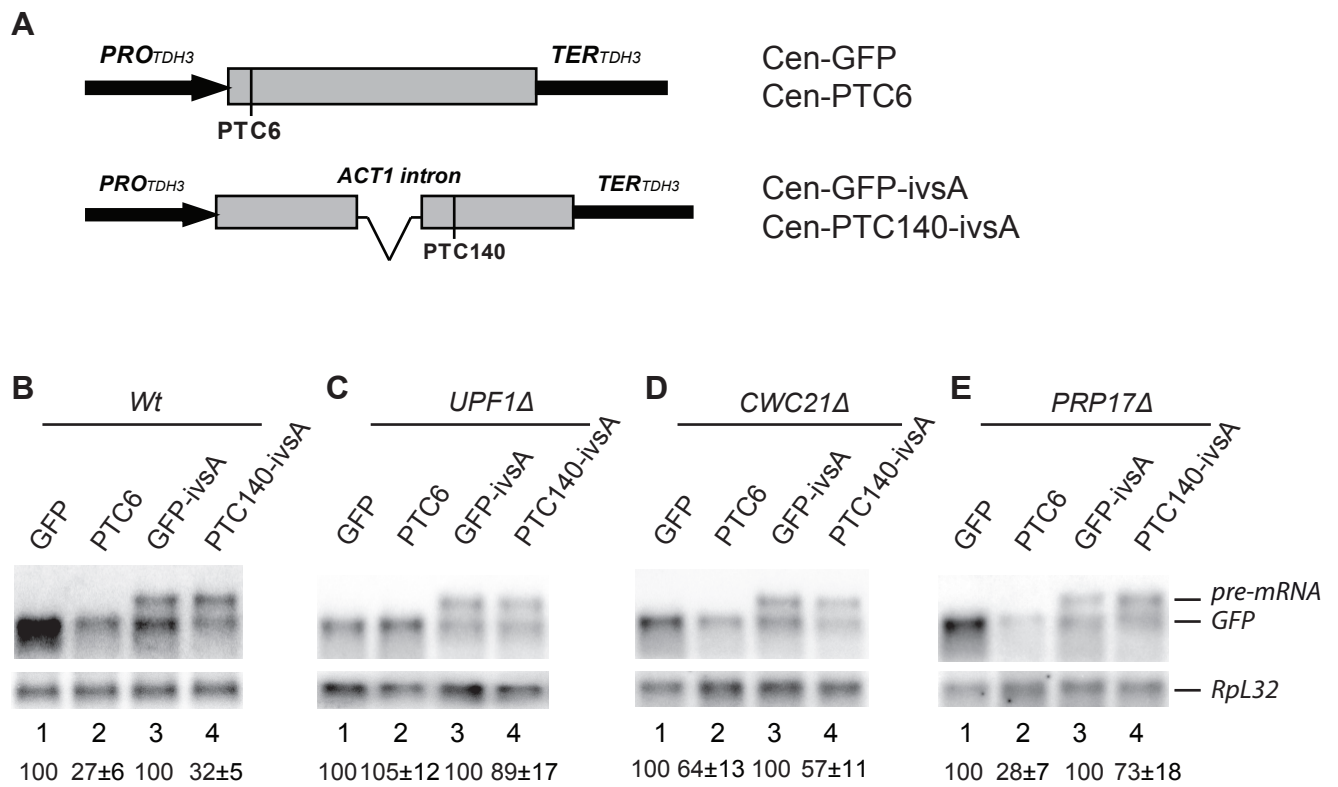

Source: https://www.biorxiv.org/content/early/2017/07/24/149245.full.pdf
